# Supplementary material for: Impact of lenalidomide maintenance on the immune environment of multiple myeloma patients with low tumor burden after autologous stem cell transplantation
Source: PubMed Central journal article supplement (PMC5945510; doi:10.18632/oncotarget.24944), 2018-04-17
Supplement: oncotarget-09-20476-s001.pdf [file oncotarget-09-20476-s001.pdf]

# Impact of lenalidomide maintenance on the immune environment of multiple myeloma patients with low tumor burden after autologous stem cell transplantation

## SUPPLEMENTARY MATERIALS

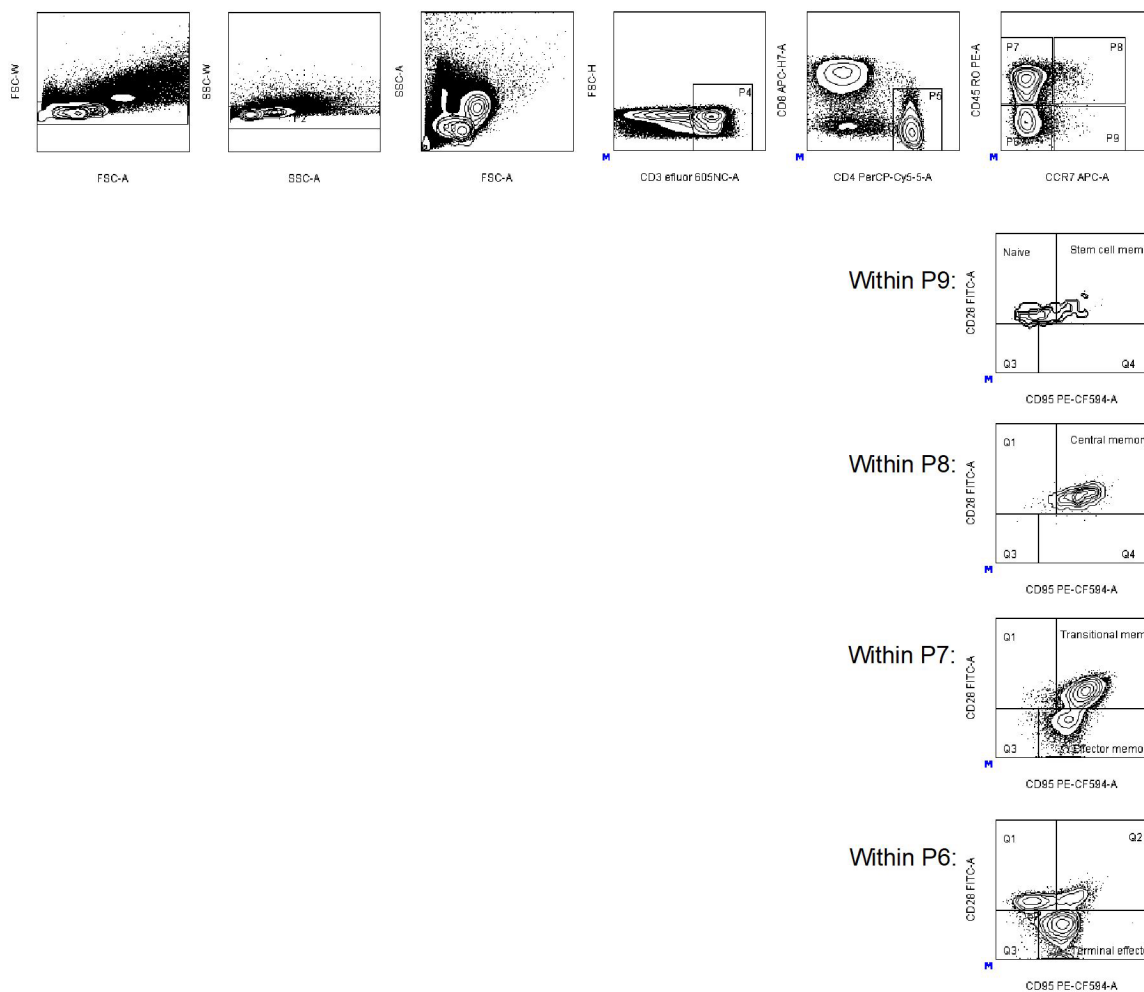

**Supplementary Figure 1: The flow cytometry plots show the T cell subset gating strategy.** First, we gated on single cells using FSC-A/FSC-W and SSC-A/SSC-W plots. Next, we gated on the lymphocytes using FSC-A/SSC-A plots. Within the CD3<sup>+</sup> population, we gated on CD4<sup>+</sup> and CD8<sup>+</sup> T cells. Next, we identified 4 populations based on CCR7 and CD45RO expression. Within CD45RO<sup>-</sup> CCR7<sup>+</sup> population (P9): naïve (CD28<sup>+</sup> CD95<sup>-</sup>) and stem cell memory (CD28<sup>+</sup> CD95<sup>+</sup>) T cells were identified. Within the CD45RO<sup>+</sup> CCR7<sup>+</sup> population (P8) the central memory T cells (CD28<sup>+</sup> CD95<sup>+</sup>) T cells were identified. Within the CD45RO<sup>-</sup> CCR7<sup>+</sup> population (P7), the transitional memory (CD28<sup>+</sup> CD95<sup>+</sup>) and the effector memory T cells (CD28<sup>-</sup> CD95<sup>+</sup>) were identified. Finally, within the CD45RO<sup>-</sup> CCR7<sup>-</sup> population (P6), the terminal effector T cells (CD28<sup>-</sup> CD95<sup>-</sup>) were identified.

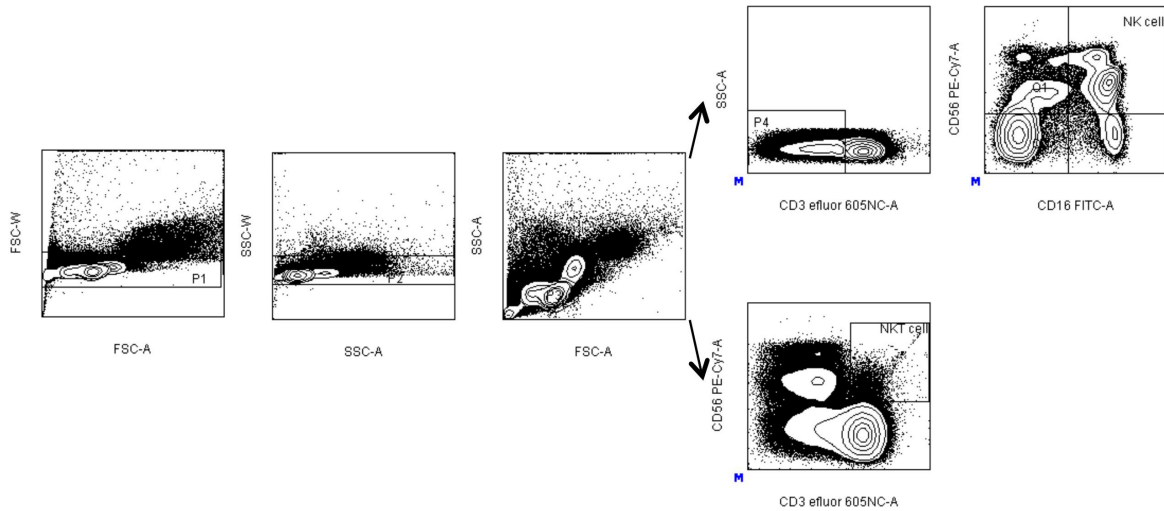

**Supplementary Figure 2: The flow cytometry plots show the NK and NKT cell subset gating strategy.** First, we gated on single cells using FSC-A/FSC-W and SSC-A/SSC-W plots. For the NK cells, we first gated on CD3<sup>-</sup> cells. Within the CD3<sup>-</sup> population, NK cells were defined as CD56<sup>+</sup> CD16<sup>+</sup> cells. NKT cells were defined as CD3<sup>+</sup> CD56<sup>+</sup> cells.

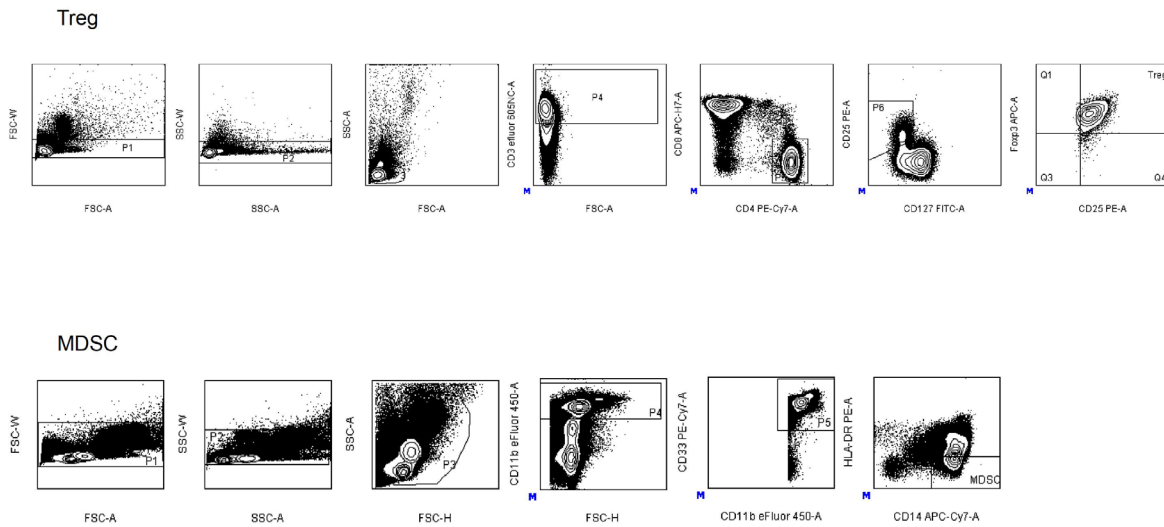

**Supplementary Figure 3: The flow cytometry plots show the gating strategy for immune suppressive cell types.** For the Treg stainings, we first gated on single cells using FSC-A/FSC-W and SSC-A/SSC-W plots. Next, we gated on the lymphocytes using FSC-A/SSC-A plots. Within the CD3<sup>+</sup> population, we gated on CD4<sup>+</sup> T cells. Next, we gated on the CD25<sup>high</sup> CD127<sup>low</sup> population (P6). Within P6, we gated on the Foxp3<sup>high</sup> cells. For the MDSC stainings, we first gated on single cells using FSC-A/FSC-W and SSC-A/SSC-W plots. Next, we gated on the viable cells using FSC-A/SSC-A plots. Within the CD11b<sup>+</sup> CD33<sup>+</sup> population, we gated on CD14<sup>+</sup> HLA-DR<sup>low</sup> cells.

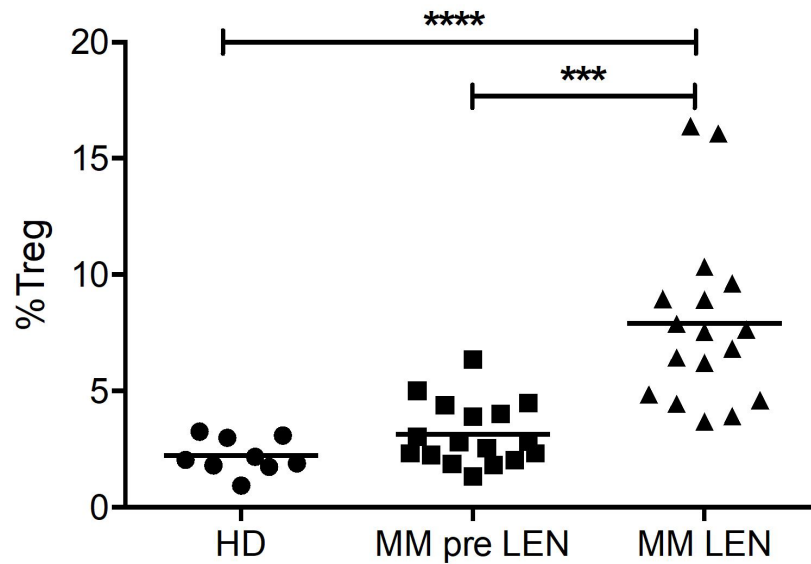

**Supplementary Figure 4: The graphs shows the Treg frequency in healthy donors compared to MM patients before or during lenalidomide maintenance therapy.** The Kruskal–Wallis test was performed to evaluate statistical significant differences,  $***p < 0.001$ , and  $****p < 0.0001$ .
